# Supplementary material for: Natural variation in stomatal response to closing stimuli among Arabidopsis thaliana accessions after exposure to low VPD as a tool to recognize the mechanism of disturbed stomatal functioning
Source: PubMed Central journal article supplement (PMC4246184; doi:10.1093/jxb/eru370), 2014-09-09
Supplement: supp_eru370_jexbot130740_file001.pdf [file supp_eru370_jexbot130740_file001.pdf]

**Title: Natural variation in stomatal response to closing stimuli among *Arabidopsis thaliana* accessions after exposure to low VPD as a tool to recognise the mechanism of disturbed stomatal functioning**

**Authors' names: Sasan Aliniaiefard and Uulke van Meeteren**

Table S1. Composition of nutrient solution

| Macro elements            |      | Micro elements |      |
|---------------------------|------|----------------|------|
| NH <sub>4</sub> (mmol/L)  | 1.7  | Na (mmol/L)    | 0.4  |
| K (mmol/L)                | 4.5  | Cl (mmol/L)    | 0.2  |
| Ca (mmol/L)               | 2.3  | Si (mmol/L)    | 0.23 |
| Mg (mmol/L)               | 1.5  | Fe (μmol/L)    | 21   |
| NO <sub>3</sub> (mmol/L)  | 4.4  | Mn (μmol/L)    | 3.4  |
| S (mmol/L)                | 3.5  | Zn (μmol/L)    | 4.7  |
| P (mmol/L)                | 1.12 | B (μmol/L)     | 14   |
| HCO <sub>3</sub> (mmol/L) | 0.6  | Cu (μmol/L)    | 6.9  |
|                           |      | Mo (μmol/L)    | <0.1 |
| EC (Ms/cm)= 1.4, pH= 7.0  |      |                |      |

Table S2. The effect of different ABA concentrations (50, 100, 200  $\mu\text{M}$ ) on PSII efficiency ( $\Phi_{\text{PSII}}$ ) under non-photorespiratory conditions for 41 *Arabidopsis* accessions which have been exposed for 4 days to moderate (1.17 kPa; M) or to low (0.23 kPa; L) VPD.  $\Phi_{\text{PSII}}$  is expressed as relative effect of ABA to the control treatment (without ABA). Leaf discs (0.5 cm diameter) were put with the abaxial surface down in petri dishes with stomata-opening medium with different ABA concentrations and  $\Phi_{\text{PSII}}$  was recorded 3 hr after application of ABA. Numbers are mean values of 8 leaf disks  $\pm$ SEM.

| Accession        | PCA number | VPD | $\Phi_{\text{PSII}} 50 \mu\text{M ABA}/\Phi_{\text{PSII C}}$ | $\Phi_{\text{PSII}} 100 \mu\text{M ABA}/\Phi_{\text{PSII C}}$ | $\Phi_{\text{PSII}} 200 \mu\text{M ABA}/\Phi_{\text{PSII C}}$ |
|------------------|------------|-----|--------------------------------------------------------------|---------------------------------------------------------------|---------------------------------------------------------------|
| <b>I-pn</b>      | 1          | M   | 0.73 $\pm$ 0.04                                              | 0.67 $\pm$ 0.03                                               | 0.58 $\pm$ 0.05                                               |
|                  |            | L   | 0.91 $\pm$ 0.01                                              | 0.93 $\pm$ 0.02                                               | 0.89 $\pm$ 0.01                                               |
| <b>Aa-0</b>      | 2          | M   | 0.80 $\pm$ 0.02                                              | 0.74 $\pm$ 0.01                                               | 0.67 $\pm$ 0.03                                               |
|                  |            | L   | 0.91 $\pm$ 0.01                                              | 0.91 $\pm$ 0.03                                               | 0.90 $\pm$ 0.03                                               |
| <b>Ag-0</b>      | 3          | M   | 0.83 $\pm$ 0.02                                              | 0.76 $\pm$ 0.02                                               | 0.70 $\pm$ 0.03                                               |
|                  |            | L   | 0.92 $\pm$ 0.02                                              | 0.90 $\pm$ 0.02                                               | 0.89 $\pm$ 0.03                                               |
| <b>Bur-0</b>     | 4          | M   | 0.66 $\pm$ 0.03                                              | 0.66 $\pm$ 0.04                                               | 0.56 $\pm$ 0.05                                               |
|                  |            | L   | 0.82 $\pm$ 0.03                                              | 0.80 $\pm$ 0.02                                               | 0.68 $\pm$ 0.04                                               |
| <b>C24</b>       | 5          | M   | 0.63 $\pm$ 0.08                                              | 0.54 $\pm$ 0.04                                               | 0.46 $\pm$ 0.03                                               |
|                  |            | L   | 0.64 $\pm$ 0.07                                              | 0.56 $\pm$ 0.07                                               | 0.49 $\pm$ 0.05                                               |
| <b>Bs-2</b>      | 6          | M   | 0.71 $\pm$ 0.05                                              | 0.68 $\pm$ 0.04                                               | 0.60 $\pm$ 0.05                                               |
|                  |            | L   | 0.88 $\pm$ 0.03                                              | 0.86 $\pm$ 0.03                                               | 0.85 $\pm$ 0.03                                               |
| <b>Cvi-0</b>     | 7          | M   | 0.87 $\pm$ 0.03                                              | 0.77 $\pm$ 0.03                                               | 0.68 $\pm$ 0.05                                               |
|                  |            | L   | 0.92 $\pm$ 0.02                                              | 0.92 $\pm$ 0.02                                               | 0.90 $\pm$ 0.02                                               |
| <b>Eri-1</b>     | 8          | M   | 0.75 $\pm$ 0.03                                              | 0.67 $\pm$ 0.04                                               | 0.55 $\pm$ 0.05                                               |
|                  |            | L   | 0.91 $\pm$ 0.01                                              | 0.86 $\pm$ 0.04                                               | 0.83 $\pm$ 0.03                                               |
| <b>Ler-1</b>     | 9          | M   | 0.85 $\pm$ 0.02                                              | 0.62 $\pm$ 0.03                                               | 0.51 $\pm$ 0.04                                               |
|                  |            | L   | 0.93 $\pm$ 0.01                                              | 0.92 $\pm$ 0.02                                               | 0.91 $\pm$ 0.01                                               |
| <b>Lis-1</b>     | 10         | M   | 0.51 $\pm$ 0.03                                              | 0.49 $\pm$ 0.04                                               | 0.43 $\pm$ 0.04                                               |
|                  |            | L   | 0.63 $\pm$ 0.02                                              | 0.64 $\pm$ 0.03                                               | 0.58 $\pm$ 0.04                                               |
| <b>Lis-2</b>     | 11         | M   | 0.86 $\pm$ 0.03                                              | 0.75 $\pm$ 0.04                                               | 0.66 $\pm$ 0.04                                               |
|                  |            | L   | 0.92 $\pm$ 0.03                                              | 0.89 $\pm$ 0.03                                               | 0.89 $\pm$ 0.03                                               |
| <b>Lm-2</b>      | 12         | M   | 0.81 $\pm$ 0.05                                              | 0.67 $\pm$ 0.03                                               | 0.62 $\pm$ 0.04                                               |
|                  |            | L   | 0.94 $\pm$ 0.02                                              | 0.91 $\pm$ 0.05                                               | 0.86 $\pm$ 0.03                                               |
| <b>Lp2-2</b>     | 13         | M   | 0.86 $\pm$ 0.02                                              | 0.85 $\pm$ 0.03                                               | 0.72 $\pm$ 0.07                                               |
|                  |            | L   | 0.95 $\pm$ 0.02                                              | 0.95 $\pm$ 0.03                                               | 0.91 $\pm$ 0.02                                               |
| <b>Map-42</b>    | 14         | M   | 0.64 $\pm$ 0.03                                              | 0.54 $\pm$ 0.04                                               | 0.45 $\pm$ 0.03                                               |
|                  |            | L   | 0.65 $\pm$ 0.04                                              | 0.56 $\pm$ 0.03                                               | 0.46 $\pm$ 0.04                                               |
| <b>Mib-15</b>    | 15         | M   | 0.83 $\pm$ 0.04                                              | 0.81 $\pm$ 0.03                                               | 0.73 $\pm$ 0.05                                               |
|                  |            | L   | 0.98 $\pm$ 0.02                                              | 0.94 $\pm$ 0.03                                               | 0.96 $\pm$ 0.02                                               |
| <b>Mnf-pot68</b> | 16         | M   | 0.66 $\pm$ 0.07                                              | 0.64 $\pm$ 0.05                                               | 0.57 $\pm$ 0.04                                               |
|                  |            | L   | 0.84 $\pm$ 0.05                                              | 0.84 $\pm$ 0.03                                               | 0.75 $\pm$ 0.05                                               |

|                  |    |   |           |            |           |
|------------------|----|---|-----------|------------|-----------|
| <b>Mt-0</b>      | 17 | M | 0.71±0.03 | 0.58±0.05  | 0.55±0.06 |
|                  |    | L | 0.93±0.02 | 0.89±0.02  | 0.80±0.05 |
| <b>Mz-0</b>      | 18 | M | 0.59±0.04 | 0.58±0.04  | 0.49±0.04 |
|                  |    | L | 0.76±0.06 | 0.79±0.03  | 0.71±0.06 |
| <b>Nfa-10</b>    | 19 | M | 0.71±0.04 | 0.74±0.02  | 0.72±0.05 |
|                  |    | L | 0.92±0.02 | 0.92±0.02  | 0.91±0.02 |
| <b>Ost-0</b>     | 20 | M | 0.49±0.05 | 0.44±0.01  | 0.42±0.03 |
|                  |    | L | 0.69±0.04 | 0.58±0.04  | 0.55±0.03 |
| <b>Pa-1</b>      | 21 | M | 0.79±0.05 | 0.68±0.04  | 0.62±0.07 |
|                  |    | L | 0.93±0.02 | 0.95±0.01  | 0.93±0.01 |
| <b>Par-5</b>     | 22 | M | 0.66±0.04 | 0.70±0.05  | 0.53±0.05 |
|                  |    | L | 0.88±0.03 | 0.89±0.02  | 0.87±0.02 |
| <b>Pent-1</b>    | 23 | M | 0.48±0.02 | 0.47±0.03  | 0.40±0.03 |
|                  |    | L | 0.64±0.08 | 0.66±0.04  | 0.54±0.04 |
| <b>Per-1</b>     | 24 | M | 0.80±0.05 | 0.76±0.04  | 0.70±0.06 |
|                  |    | L | 0.97±0.02 | 0.99±0.03  | 0.94±0.02 |
| <b>Petergof</b>  | 25 | M | 0.77±0.04 | 0.66±0.05  | 0.59±0.04 |
|                  |    | L | 0.90±0.02 | 0.88±0.03  | 0.84±0.02 |
| <b>Pla</b>       | 26 | M | 0.72±0.02 | 0.63±0.05  | 0.56±0.04 |
|                  |    | L | 0.90±0.03 | 0.80±0.04  | 0.77±0.03 |
| <b>Pog-0</b>     | 27 | M | 0.73±0.03 | 0.62±0.04  | 0.55±0.04 |
|                  |    | L | 0.91±0.03 | 0.91±0.02  | 0.88±0.03 |
| <b>Pro-0</b>     | 28 | M | 0.80±0.03 | 0.69±0.05  | 0.60±0.05 |
|                  |    | L | 0.90±0.03 | 0.91±0.03  | 0.86±0.02 |
| <b>Pu2-23</b>    | 29 | M | 0.78±0.05 | 0.72±0.06  | 0.61±0.06 |
|                  |    | L | 0.86±0.03 | 0.88±0.01  | 0.87±0.01 |
| <b>Ren-1</b>     | 30 | M | 0.64±0.07 | 0.64±0.03  | 0.46±0.03 |
|                  |    | L | 0.89±0.02 | 0.84±0.05  | 0.79±0.04 |
| <b>Sapporo-0</b> | 31 | M | 0.78±0.03 | 0.73±0.02  | 0.56±0.03 |
|                  |    | L | 0.88±0.02 | 0.81±0.03  | 0.75±0.03 |
| <b>Shahdara</b>  | 32 | M | 0.73±0.02 | 0.64±0.04  | 0.50±0.03 |
|                  |    | L | 0.84±0.02 | 0.80±0.03  | 0.73±0.03 |
| <b>Ta10-60</b>   | 33 | M | 0.61±0.07 | 0.54±0.04  | 0.45±0.03 |
|                  |    | L | 0.81±0.03 | 0.779±0.04 | 0.74±0.06 |
| <b>Ta-0</b>      | 34 | M | 0.69±0.06 | 0.63±0.02  | 0.54±0.03 |
|                  |    | L | 0.77±0.04 | 0.71±0.05  | 0.65±0.06 |
| <b>Ws-0</b>      | 35 | M | 0.74±0.04 | 0.62±0.03  | 0.53±0.04 |
|                  |    | L | 0.89±0.03 | 0.81±0.06  | 0.75±0.03 |
| <b>Zdrl2-25</b>  | 36 | M | 0.77±0.05 | 0.63±0.03  | 0.55±0.04 |
|                  |    | L | 0.88±0.03 | 0.82±0.04  | 0.78±0.03 |
| <b>Col-0</b>     | 37 | M | 0.84±0.02 | 0.65±0.03  | 0.54±0.03 |
|                  |    | L | 0.92±0.02 | 0.90±0.02  | 0.86±0.02 |
| <b>Kas-1</b>     | 38 | M | 0.81±0.04 | 0.70±0.07  | 0.57±0.06 |
|                  |    | L | 0.96±0.03 | 0.93±0.04  | 0.90±0.05 |
| <b>Bay-0</b>     | 39 | M | 0.84±0.03 | 0.70±0.06  | 0.59±0.03 |
|                  |    | L | 0.91±0.04 | 0.89±0.04  | 0.86±0.03 |

---

|              |    |   |           |           |           |
|--------------|----|---|-----------|-----------|-----------|
| <b>Ba-1</b>  | 40 | M | 0.88±0.02 | 0.69±0.05 | 0.51±0.03 |
|              |    | L | 0.95±0.02 | 0.93±0.02 | 0.92±0.03 |
| <b>RRS-7</b> | 41 | M | 0.75±0.03 | 0.73±0.05 | 0.59±0.03 |
|              |    | L | 0.92±0.01 | 0.90±0.03 | 0.78±0.02 |

---

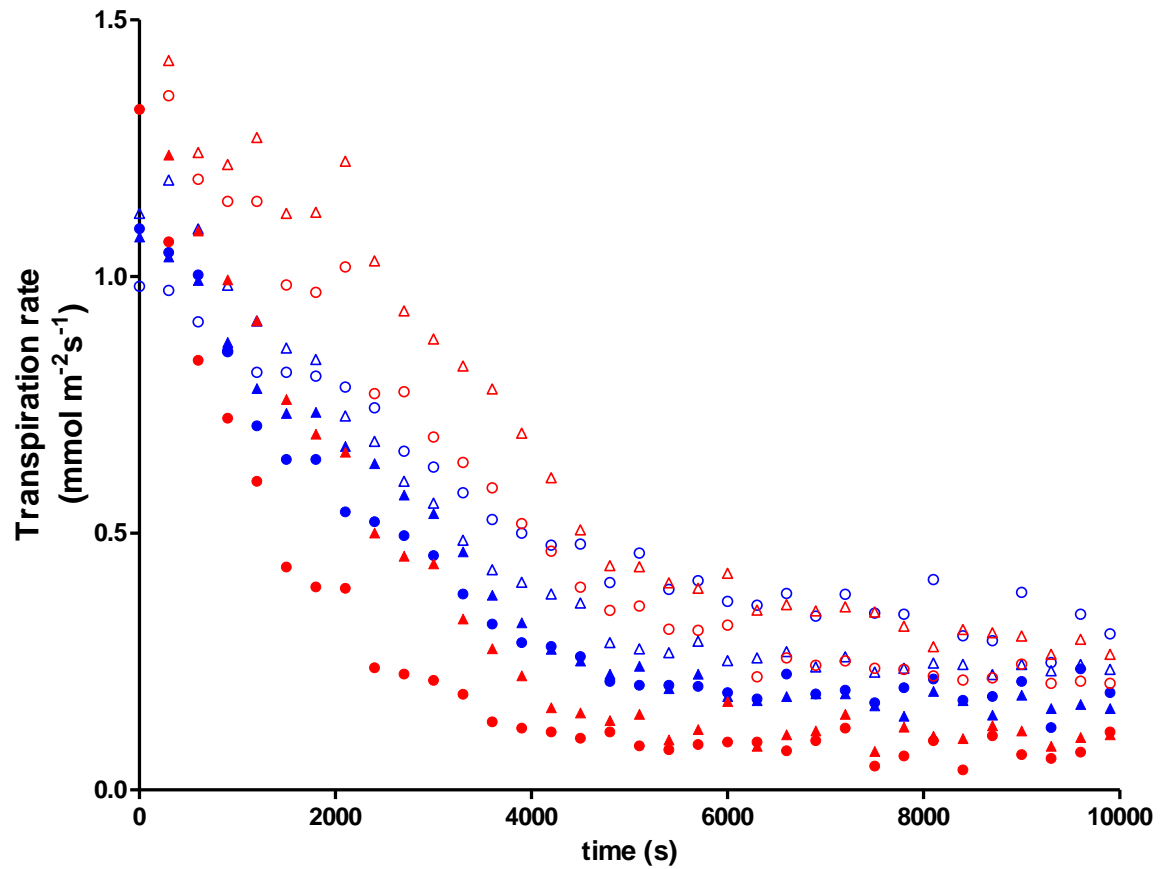

Figure S1. Transpiration rate (E) for Col-0 (blue symbols) and Cvi-0 (red symbols) *Arabidopsis* accessions during 10000 s desiccation of leaves of plants that have been exposed for 4 days to moderate (1.17 kPa; filled symbols) or to low (0.23 kPa; open symbols) VPD. The leaves were first saturated in degassed deionized water and after 1 hr measurements were conducted at VPD of 1.40 kPa. Circle and triangle symbols showing different repetitions.

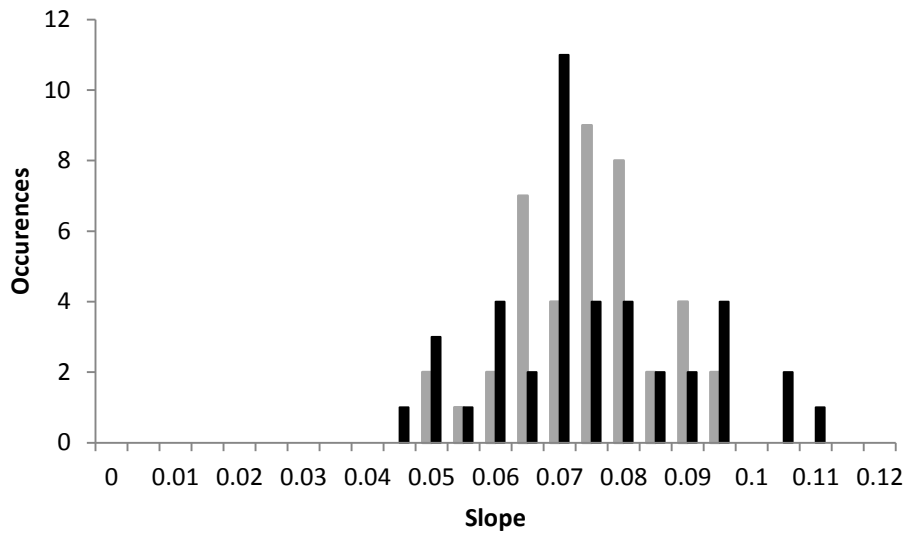

Figure S2. Distribution of 41 *Arabidopsis* accessions that have been exposed for 4 days to moderate (1.17 kPa; black bars) or to low (0.23 kPa; grey bars) VPD according to Slope of E×RWC during 10000 s desiccation of the leaves. The leaves were first saturated in degassed deionized water and after 1 hr measurements were conducted at VPD of 1.40 kPa.

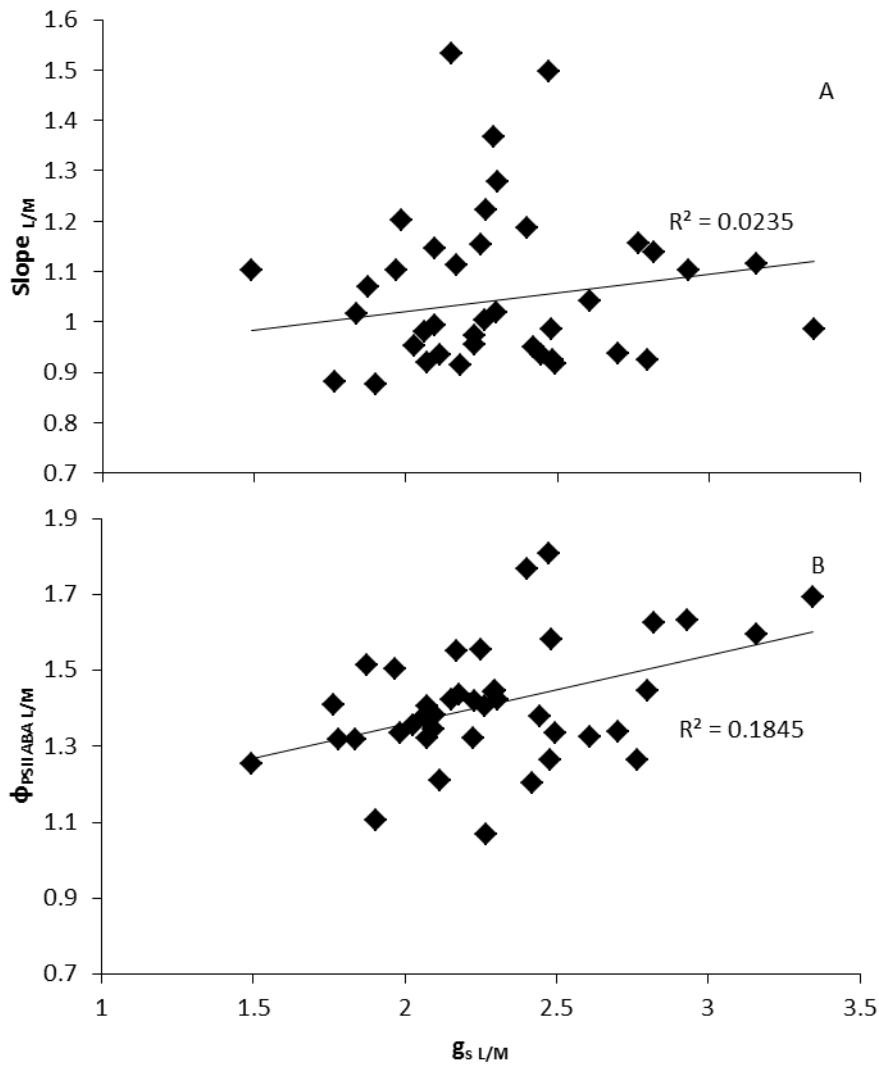

Figure S3. Relation between the effect of prior VPD-exposure on stomatal conductance ( $g_s$ ) and desiccation response (a) or ABA response (b) of 41 *Arabidopsis* accessions. Plants had been exposed for 4 days to low VPD (0.23 kPa) or to moderate VPD (1.17 kPa). The effect of prior VPD on stomatal conductance was expressed as ratio between  $g_s$  at L/ $g_s$  at M ( $g_s \text{ L/M}$ ), on desiccation response as the ratio of the Slopes of  $\text{RWC} \times \text{E}$  at L and M ( $\text{Slope}_{L/M}$ ), and on ABA response as the ratio of the relative effects of 200  $\mu\text{M}$  ABA to  $\Phi_{\text{PSII}}$  ( $\Phi_{\text{PSII } 200 \text{ ABA}} / \Phi_{\text{PSII } C}$ ) at low and moderate VPD ( $\Phi_{\text{PSII } \text{ABA}} \text{ L/M}$ ). Measurements of  $g_s$  were conducted at a VPD of 1.40 kPa.



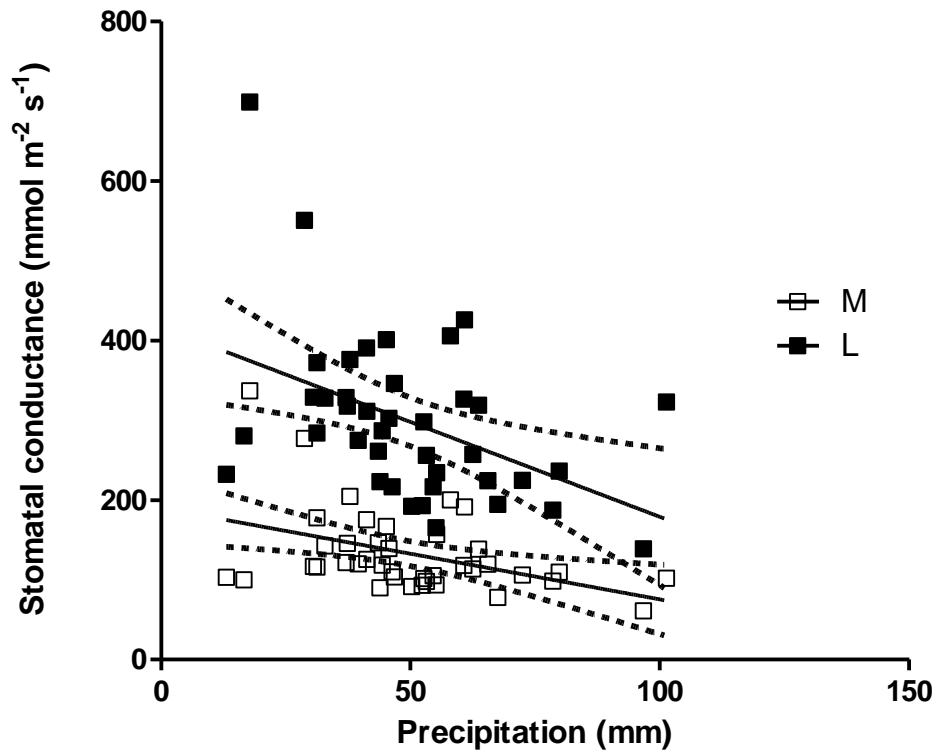

Figure S4. Relation between the effect of 4-day VPD-exposure on stomatal conductance ( $g_s$ ) and average seasonal precipitation for 41 *Arabidopsis* accessions. Plants had been exposed to moderate VPD (1.17 kPa; open symbols) or to low (0.23 kPa; filled symbols) VPD. Measurements of  $g_s$  were conducted at a VPD of 1.40 kPa.
